# Supplementary material for: The role of daratumumab in relapsed/refractory CD38 positive acute leukemias—case report on three cases with a literature review
Source: PubMed Central journal article supplement (PMC10628456; doi:10.3389/fonc.2023.1228481), 2023-10-24
Supplement: DataSheet_1.pdf [file DataSheet_1.pdf]

## Supplementary

Table 1

The characteristics of genetic aberrations

| Patient                         | #1                                                                           | #2                                                                                           | #3                                                                                                                                                              |
|---------------------------------|------------------------------------------------------------------------------|----------------------------------------------------------------------------------------------|-----------------------------------------------------------------------------------------------------------------------------------------------------------------|
| diagnosis                       |                                                                              |                                                                                              |                                                                                                                                                                 |
|                                 | Pre-T ALL                                                                    | T-ALL                                                                                        | <u>MPAL T/myeloid</u>                                                                                                                                           |
| karyotype                       | 46,XX,t(2;17)(q21;q23)[5]/46,XX[7].                                          | No data                                                                                      | No metaphases                                                                                                                                                   |
| FISH                            | Not performed                                                                | No data                                                                                      | Not performed                                                                                                                                                   |
| mutation                        | none                                                                         | TRA/D (t14q11.2)                                                                             | none                                                                                                                                                            |
| immunophenotype                 | CD34+,CD33-, CD117-, CD19-, CD20-, CD3+, CD10+, TdT+, CD99+, CD79a+/-, CD7+, | No data                                                                                      | CD45+, CD34+, CD117+, HLA-DR+,cCD3+, CD3(-), CD13+, CD7+, CD4+, cTdT+, CD99+, CD56+, CD45RA+                                                                    |
| Bcl-2 ekspression               | Not performed                                                                | No data                                                                                      | Not performed                                                                                                                                                   |
| Before Dara-Bor-ven-Asp therapy |                                                                              |                                                                                              |                                                                                                                                                                 |
| karyotype                       | 46,XX,t(2;17)(q21;q23)[5]/46,XX[7]                                           | 46,XX,del(5)(q22q33),del(11)(q22q33)[12]/46,XY[9]                                            | No metaphases                                                                                                                                                   |
| mutation                        | none                                                                         | none                                                                                         | <i>NGS -mutations in CSF3R, WT1, ASXL1, and DDX41</i>                                                                                                           |
| immunophenotype                 | CD34+,CD33-, CD117-, CD19-, CD20-, CD3+, CD10+, TdT+, CD99+, CD79a+/-, CD7+, | CD34+,CD33-, CD117-, CD19-, CD3-, CD10+, TdT+/-, CD99+, CD79a+/-, CD7+, CD2 -, CD4-, , CD38+ | CD45+, CD7+, CD117+, CD4-, CD123(var), CD56+, CD5-, cCD3+, CD2+, CD8-, CD33-, nTdT+, CD99+, sCD3-, TCRab-, CD44+, CD1a-, HLA-DR+, CD45RA-, TCRgd-, CD13+, CD38+ |
| Bcl-2 ekspression               | Not performed                                                                | Not performed                                                                                | Not performed                                                                                                                                                   |

Table2

Characteristic of patient's previous therapy before DaraBorVenAsp therapy

| Patient   | #1                                                                                                                                                                                                                                                                                                                                                                                                                                                                              | #2                                                                                                                                                                                                                                                                                                                                                                                                                                                                                                                                                                                                                                                                                                                                                                                                                                                                                                                                                                                                                                          | #3                                                                                                                                                                                                                                                                                                                                                                                                                                                                                                                                                                                                                                                                                                                                                                                                                                                                                                |
|-----------|---------------------------------------------------------------------------------------------------------------------------------------------------------------------------------------------------------------------------------------------------------------------------------------------------------------------------------------------------------------------------------------------------------------------------------------------------------------------------------|---------------------------------------------------------------------------------------------------------------------------------------------------------------------------------------------------------------------------------------------------------------------------------------------------------------------------------------------------------------------------------------------------------------------------------------------------------------------------------------------------------------------------------------------------------------------------------------------------------------------------------------------------------------------------------------------------------------------------------------------------------------------------------------------------------------------------------------------------------------------------------------------------------------------------------------------------------------------------------------------------------------------------------------------|---------------------------------------------------------------------------------------------------------------------------------------------------------------------------------------------------------------------------------------------------------------------------------------------------------------------------------------------------------------------------------------------------------------------------------------------------------------------------------------------------------------------------------------------------------------------------------------------------------------------------------------------------------------------------------------------------------------------------------------------------------------------------------------------------------------------------------------------------------------------------------------------------|
| treatment | <p><b>First line</b><br/>hyperCVAD C1D1<br/>18.07.2022 r.<br/>response:<br/>NR - MRD<br/>41,71%<br/>Toxicity -no</p> <p><b>Second line</b><br/>nelarabine (days<br/>1,3,5),<br/>daratumumab (2,<br/>15), bortezomib<br/>(twice a week - 5<br/>x), peg-<br/>asparaginase (7<br/>d.) C1D1<br/>04.08.2022 r<br/>venetoclax a la<br/>longue since<br/>04.08.2022 r.<br/>response</p> <p>MRD –<br/>day 14<br/>=&gt;1,57%,<br/>day 21<br/>=&gt;0,05%,<br/>day 28.<br/>=&gt;0,018%</p> | <p><b>First line in Belarus</b><br/>3 x HyperCVAD/MA<br/>(21.11.2020-<br/>15.03.2021) - CR<br/>(MRD+)<br/>TreoFlu + mMUD-<br/>alloPBSCT [9/10]<br/>(29.04.2021) - CR<br/>(MRD-) (05.2021)</p> <p><b>First. Relapse</b><br/>(01.2022)<br/><b>(treated in Trukey):</b><br/><b>1 line relapsed</b><br/>Rytuksymab +<br/>Metotreksat +<br/>Winkrystyna +<br/>Doksorubicyn (02-<br/>03.2022) - PD</p> <p><b>2 line relapsed</b><br/>(Turkey)<br/>Clofarabine +<br/>Cytarabine (04-<br/>05.2022) - PD (70%<br/>blasts)</p> <p><b>3 line. relapsed</b><br/>(Turkey):<br/>Bortezomib +<br/>Wenetoklaks since<br/>06.2022) - CR (MRD<br/>&lt;1%;) (28.06.2022)</p> <p><b>Maintanance</b><br/>Wenetoklaks<br/>monotherapy till<br/>8.07.2022 - PD<br/>(MRD 3,564%)<br/>(11.07.2022)</p> <p><b>Second relapse</b><br/>.Gdansk, Poland</p> <p><b>1 line second<br/>relapse</b><br/>Nelarabina 1,5 g/m2<br/>(26, 28, 30.07.2022)<br/>- PD (MRD 54,166%)<br/>(9.08.2022)</p> <p><b>2 line second<br/>relapse</b><br/>. Bortezomib +<br/>Daratumumab +</p> | <p><b>First line</b><br/>2xHyperCVAD/MA+<br/>Asparaginase=&gt; CR</p> <p><b>Allo-PBSCT</b><br/>(04.11.2014)</p> <p><b>First Relapse</b><br/>(extramedullary – right<br/>tonsil and lymph nodes<br/>of neck 7.03.2019)</p> <p>3x nelarabine (20.03 -<br/>13.05.2019) - PET-CT<br/>(05.2019) – CR</p> <p>+Radiotherapy of right<br/>tonsil+ ruxolitinib<br/>(07.2019-04.2022)</p> <p><b>2nd RELAPSE</b> (CNS<br/>involvement +<br/>extramedullary (skin,<br/>nasopharynx, kidneys,<br/>genitals, inguinal and<br/>iliac lymph nodes -<br/>04.2022)</p> <p>C1 Azacitidine<br/>75mg/m2 (7days) +<br/>4xAra-C 3000mg/m2 +<br/>venetoclax 400 mg x28<br/>days</p> <p>C2D1 25.05.2022<br/>Azacitidine 75mg/m2 i<br/>Venetoclax 400-200-<br/>100mg - MRD(-)</p> <p><b>II Allo-PBSCT</b><br/>(13.07.2022)</p> <p><b>3rd RELAPSE</b> (+80d II<br/>allo HCT -<br/>extramedullary disease<br/>13.10.2022)</p> |

|                                |                                         |                                                                                 |                                                                                                                                                                                                                                                                                                                                                                                                                                                                                               |
|--------------------------------|-----------------------------------------|---------------------------------------------------------------------------------|-----------------------------------------------------------------------------------------------------------------------------------------------------------------------------------------------------------------------------------------------------------------------------------------------------------------------------------------------------------------------------------------------------------------------------------------------------------------------------------------------|
|                                |                                         | Wenetoklaks + PEG-Asparaginaza (C1D1 - 12.08.2022) - iCR MRD 0,024% (6.09.2022) | <p>C1D1 5.10.22 - Bortezomib (5.10,10.10, 13.10), Venetoclax, 05.10-20.10 -, Daratumumab - I 13.10, II 20.10. III 27.10.22, IV 4.11.2022</p> <p>C2D1 14.11.2022 Azacitidine, Venetoclax, Daratumumab</p> <p>C3 Daratumumab 12.01.23, Azacitidine+Venetoclax 16.01.23. + DLI - I dose <math>2.31 \times 10^6</math> CD3/kg (27.1.2023)</p> <p>C4 Azacitidine 100mg+Venetoclax 100mg 7 days (C4D1 20.3.2023)- II DLI <math>9.23 \times 10^6</math> CD3/kg (29.3.2023)</p> <p>⇒ CR , MRD (-)</p> |
| alloSCT after Dara/Bor/Ven/Asp | Performed on 39 dy of second line cycle | Performed on 42 days of the last cycle                                          | N/A                                                                                                                                                                                                                                                                                                                                                                                                                                                                                           |

Table 3

The characteristic of allo-SCT after Dara-Bor-Ven therapy (2 pts) and before Dara-Bor-Ven(1 pts)

| Patient              | #1                                                                           | #2                                                                         | #3                                          |
|----------------------|------------------------------------------------------------------------------|----------------------------------------------------------------------------|---------------------------------------------|
| date                 | 13.09.2022                                                                   | 26.09.22                                                                   | 13.07.2022                                  |
| Type                 | haploidentical                                                               | haploidentical                                                             | MUD                                         |
| Donor                | father                                                                       | mother                                                                     | unrelated                                   |
| Donor/Reciepent sex  | M/F                                                                          | F/F                                                                        | M/F                                         |
| HLA matching         | 7/10                                                                         | 5/10                                                                       | 10/10                                       |
| conditioning         | TBI 12 Gy (6-8.09.2022) Flu150 mg/m2 (10-12.09.2022)                         | TBI 8 Gy/ Fludarabine150 mg/m2                                             | TBF                                         |
| Source of stem cells | PBSC                                                                         | PBSC                                                                       | PBSC                                        |
| immunosupression     | PTCY/ MMF/ TAC                                                               | PTCy/MMF/TAC                                                               | ATG/CSA/MTX                                 |
| GVHD                 | aGVHD late onset- skin overlapGVHD moderate skin -grade 2 - liver - grade. 1 | aGVHD - no cGVHD - liver moderate grade2                                   | aGVHD -no cGVHD liver and skin grade 2      |
| Response -MRD        | +30 day - 0.005%<br>+100 day- 0.003%<br>+180 day- 0,008%                     | +30day- 0.001%<br>+100day- 0.002%<br>+180 days - 0.002%<br>Chimerism 100%, | +80 day relapse<br><br>Dara/bor/ven therapy |

MUD- match unrelated donor , TBI -total body irradiation, TBF -Thiotepa Fludarabine Busulfan,

PBSC- peripheral blood stem cell, PTCY- post transplant cyclophosphamide, MMF –mycophenolate mofetil, TAC – tacrolimus, ATG antithymocyte globulin, CSA cyclosporine, MTX – methotrexate,

aGVHD -acute graft versus host disease , cGVHD -chronic graft versus host disease, MRD – minimal residual disease

Tabl 4. CD38 expression on blasts cell of B -ALL, T- ALL and MPAL myeloid/T cell

| initials | Diagnosis      | Date of Diagnosis | CD38 result         |
|----------|----------------|-------------------|---------------------|
| BN       | pre-B-ALL      | 20.04.2022        | positive med.       |
| BJ       | pro-B-ALL      | 01.02.2022        | positive weak       |
| FZ       | common-B-ALL   | 02.12.2021        | positive weak       |
| GA       | common-B-ALL   | 08.12.2021        | positive weak       |
| KA       | MPAL T/My      | 2022-05-18        | positive med.       |
| KI       | common-B-ALL   | 26.07.2022        | positive med.       |
| KD       | common-B-ALL   | 17.09.2021        | positive med.       |
| LZ       | common-B-ALL   | 22.12.2021        | positive weak       |
| LS       | common-B-ALL   | 26.04.2022        | positive weak       |
| LA       | common-B-ALL   | 30.08.2021        | positive weak       |
| MR       | pre-T-ALL      | 07.02.2022        | nd                  |
| MD       | common-B-ALL   | 02.12.2021        | positive weak       |
| PA       | pro-B-ALL      | 22.04.2022        | positive weak       |
| Pf       | MPAL T/My      | 24.11.2021        | positive med.       |
| PA       | common-B-ALL   | 11.05.2122        | positive med.       |
| RS       | common-B-ALL   | 08.11.2021        | positive med.       |
| RA       | pre-T-ALL      | 12.07.2022        | positive med. (75%) |
| SA       | MPAL T/My      | 01.04.2022        | positive med.       |
| SI       | pro-B-ALL      | 02.08.2022        | positive med.       |
| SJ       | common-B-ALL   | 30.11.2021        | positive weak       |
| SI       | common-B-ALL   | 29.03.2022        | neg./weak           |
| SR       | MPAL T/My      | 21.12.2021        | positive med.       |
| ZK       | common-B-ALL   | 18.10.2021        | positive med.       |
| BS       | MPAL T/My      | 13.12.2022        | positive weak       |
| BR       | ETP            | 23.08.2022        | nd                  |
| FY       | common-B-ALL   | 04.11.2022        | positive weak       |
| HK       | common-B-ALL   | 06.12.2022        | positive weak       |
| HR       | common-B-ALL   | 28.09.2022        | positive weak       |
| JA       | common-B-ALL   | 15.11.2022        | positive weak       |
| LD       | pre-B-ALL      | 29.12.2022        | positive weak       |
| NP       | pre-B-ALL      | 20.10.2022        | positive med.       |
| RA       | common-B-ALL   | 25.10.2022        | positive weak       |
| SM       | cortical T     | 16.11.2022        | nd                  |
|          |                |                   |                     |
| M        | cortical T-ALL | 29.01.2021        | nd                  |
| R        | common-B-ALL   | 11.08.2021        | positive med.       |
| J        | pro-B-ALL      | 01.03.2021        | positive med.       |
| I        | pre-T-ALL      | 05.03.2021        | nd                  |
| N        | common-B-ALL   | 06.04.2021        | positive med.       |
| M        | common-B-ALL   | 01.03.2021        | positive med.       |
| W        | MPAL B/T       | 01.04.2021        | positive med.       |

|          |                |            |                 |
|----------|----------------|------------|-----------------|
| H        | pre-B-ALL      | 14.05.2021 | positive med.   |
| Ł        | cortical T-ALL | 10.03.2021 | nd              |
| G        | pre-T-ALL      | 08.03.2021 | positive bright |
| M        | common-B-ALL   | 06.04.2021 | positive med.   |
| M        | common-B-ALL   | 30.04.2021 | positive med.   |
| D        | common-B-ALL   | 13.04.2021 | positive med.   |
| K        | common-B-ALL   | 18.03.2021 | positive med.   |
| M        | common-B-ALL   | 07.06.2021 | positive med.   |
| M        | pro-B-ALL      | 04.01.2021 | positive med.   |
| J        | common-B-ALL   | 01.07.2021 | positive weak   |
| W        | pre-B-ALL      | 24.06.2021 | positive med.   |
| P        | common-B-ALL   | 15.02.2021 | positive weak   |
| B        | common-B-ALL   | 12.05.2021 | positive med.   |
| K        | mature-T-ALL   | 20.07.2021 | positive bright |
| E        | common-B-ALL   | 04.03.2020 | positive med.   |
| W        | common-B-ALL   | 02.09.2020 | positive med.   |
| W        | common-B-ALL   | 27.01.2020 | positive med.   |
| J        | common-B-ALL   | 08.09.2020 | positive med.   |
| M        | common-B-ALL   | 08.09.2020 | positive med.   |
| K        | common-B-ALL   | 05.03.2020 | positive med.   |
| M        | common-B-ALL   | 17.03.2020 | neg/weak        |
| B        | pre-B-ALL      | 17.04.2020 | positive weak   |
| Wojciech | common-B-ALL   | 08.05.2020 | positive weak   |
| M        | common-B-ALL   | 07.02.2020 | positive bright |
| I        | pro-B-ALL      | 05.03.2020 | positive weak   |
| B        | common-B-ALL   | 30.04.2020 | positive med.   |
| S        | common-B-ALL   | 27.01.2020 | positive med.   |
| M        | pre-T-ALL      | 25.02.2020 | nd              |
